# Supplementary material for: Predictors of Prenatal Depression: A Cross-Sectional Study in Rural Pakistan
Source: PubMed Central journal article supplement (PMC8461022; doi:10.3389/fpsyt.2021.584287), 2021-09-10
Supplement: Data_Sheet_1.pdf [file Data_Sheet_1.pdf]

Supplementary table 1: Association of maternal characteristics with prenatal depression

| Maternal /Obstetrics characteristics   | Categories                | Depression |               |          |              | p-value       |
|----------------------------------------|---------------------------|------------|---------------|----------|--------------|---------------|
|                                        |                           | No         |               | Yes      |              |               |
| Mean age in years                      |                           |            | 26.5<br>±4.3  |          | 27.3±<br>5.2 | <0.05*        |
| Mean BMI                               |                           |            | 26.1<br>±15.3 |          | 25.1<br>±8.9 | 0.403         |
|                                        |                           | <b>N</b>   | <b>%</b>      | <b>N</b> | <b>%</b>     |               |
| Age category                           | 16-22                     | 49         | 53.8          | 42       | 46.2         | 0.091         |
|                                        | 23-30                     | 171        | 53.9          | 146      | 46.1         |               |
|                                        | 31+                       | 38         | 41.3          | 54       | 58.7         |               |
| women's education                      | No formal education       | 33         | 38.4          | 53       | 61.6         | <0.001**<br>* |
|                                        | Primary/Middle            | 87         | 44.6          | 108      | 55.4         |               |
|                                        | Sec/H. secondary          | 99         | 61.5          | 62       | 38.5         |               |
|                                        | Bachelors                 | 39         | 67.2          | 19       | 32.2         |               |
| BMI ( Pre-Pregnancy)                   | Under weight              | 65         | 55.1          | 53       | 44.9         | 0.810         |
|                                        | Normal weight             | 130        | 50.8          | 126      | 49.2         |               |
|                                        | Overweight                | 51         | 51.0          | 49       | 49.0         |               |
|                                        | Obese                     | 12         | 46.2          | 14       | 53.8         |               |
| Infant Death (under one year Death)    | No                        | 231        | 52.6          | 208      | 47.4         | 0.221         |
|                                        | Yes                       | 27         | 44.3          | 34       | 55.7         |               |
| Child mortality (1-5 year Child Death) | No                        | 226        | 52.3          | 206      | 47.2         | 0.420         |
|                                        | Yes                       | 32         | 47.1          | 36       | 52.9         |               |
| Miscarriage                            | No                        | 195        | 54.3          | 164      | 45.7         | 0.052         |
|                                        | Yes                       | 63         | 44.7          | 78       | 55.3         |               |
| No of living children                  | 0                         | 46         | 30.6          | 104      | 69.3         | <0.001**<br>* |
|                                        | 1-3                       | 187        | 62.7          | 112      | 37.3         |               |
|                                        | 4+                        | 25         | 49.5          | 26       | 50.5         |               |
| Duration of pregnancy                  | 2 <sup>nd</sup> trimester | 96         | 31.4          | 209      | 68.6         | 0.631         |
|                                        | 3 <sup>rd</sup> trimester | 162        | 83.1          | 33       | 16.9         |               |
| Health in last 30 days                 | Good                      | 144        | 90.5          | 15       | 9.43         | <0.001**<br>* |
|                                        | Moderate                  | 101        | 51.2          | 96       | 48.7         |               |
|                                        | Bad                       | 13         | 9.0           | 131      | 91.0         |               |
| Delivery place                         | Hospital                  | 161        | 57.7          | 118      | 42.3         | <0.05*        |
|                                        | Home                      | 35         | 48.4          | 37       | 51.6         |               |
|                                        | other                     | 62         | 41.7          | 87       | 58.3         |               |
| Plan to use Modern Contraceptives      | No                        | 138        | 62.4          | 83       | 37.6         | 0.151         |
|                                        | Yes                       | 120        | 43.0          | 159      | 57.0         |               |
| No of pregnancies                      | < 3                       | 158        | 49.1          | 164      | 50.9         | <0.001**<br>* |
|                                        | 4-6                       | 87         | 59.2          | 60       | 40.8         |               |
|                                        | > 6                       | 13         | 41.0          | 18       | 59.0         |               |

\*Significant \*\*highly significant \*\*\*extremely significant

**Supplementary Table 2 Socioeconomic characteristics and depression**

| Socioeconomic Factors      | Categories      | Depression |      |     |      | p-value   |
|----------------------------|-----------------|------------|------|-----|------|-----------|
|                            |                 | No         |      | Yes |      |           |
|                            |                 | N          | %    | N   | %    |           |
| Women employment           | No              | 242        | 52.4 | 220 | 47.6 | 0.223     |
|                            | Yes             | 16         | 42.1 | 22  | 57.9 |           |
| Husbands income            | < 12,000        | 134        | 45.7 | 159 | 54.3 | <0.01**   |
|                            | 12,001-21,000   | 83         | 59.3 | 57  | 40.7 |           |
|                            | 21,001 – 30,000 | 18         | 52.9 | 16  | 47.1 |           |
|                            | >30,001         | 23         | 69.7 | 10  | 30.3 |           |
| Total income               | < 12,000        | 161        | 49.7 | 163 | 50.3 | 0.480     |
|                            | 12,001-21,000   | 31         | 52.5 | 28  | 47.5 |           |
|                            | 21,001 – 30,000 | 24         | 51.1 | 23  | 48.9 |           |
|                            | >30,001         | 42         | 60.0 | 28  | 40.0 |           |
| Women empowerment status   | No              | 69         | 35.2 | 127 | 64.8 | <0.001*** |
|                            | Yes             | 189        | 62.2 | 115 | 37.8 |           |
| Wealth index               | Poorest         | 27         | 26.7 | 74  | 73.3 | <0.001*** |
|                            | Poor            | 92         | 47.2 | 103 | 52.8 |           |
|                            | Average         | 63         | 63.0 | 37  | 37.0 |           |
|                            | Rich            | 61         | 72.6 | 23  | 27.4 |           |
|                            | Richest         | 15         | 75.0 | 5   | 25.0 |           |
| Have money for basic needs | No              | 21         | 23.3 | 69  | 76.7 | <0.001*** |
|                            | Yes             | 236        | 58.4 | 168 | 41.6 |           |
|                            | Don't know      | 1          | 16.7 | 5   | 83.3 |           |
| Money for food             | No              | 23         | 25.3 | 68  | 74.7 | <0.001*** |
|                            | Yes             | 226        | 57.8 | 165 | 42.2 |           |
|                            | Don't know      | 9          | 50.0 | 9   | 50.9 |           |
| Family debt                | No              | 150        | 64.9 | 81  | 35.5 | <0.001*** |
|                            | Yes             | 88         | 37.3 | 148 | 62.7 |           |
|                            | Don't know      | 20         | 60.6 | 13  | 19.4 |           |

|                                                             |               |     |      |     |      |           |
|-------------------------------------------------------------|---------------|-----|------|-----|------|-----------|
| <b>Family structure</b>                                     | Nuclear       | 56  | 50.5 | 55  | 49.5 | 0.087     |
|                                                             | Joint         | 173 | 54.6 | 144 | 45.4 |           |
|                                                             | Multiple      | 29  | 40.3 | 43  | 59.7 |           |
| <b>Husband away from home in last 6 months</b>              | No            | 206 | 50.6 | 201 | 49.4 | 0.356     |
|                                                             | Yes           | 52  | 55.9 | 41  | 44.1 |           |
| <b>Life satisfaction</b>                                    | Satisfied     | 210 | 72.7 | 79  | 27.3 | <0.001*** |
|                                                             | Moderately    | 42  | 30.9 | 94  | 69.1 |           |
|                                                             | Not satisfied | 6   | 8.0  | 69  | 92.0 |           |
| <b>Expectation for life satisfaction in next four years</b> | Satisfied     | 224 | 65.9 | 116 | 64.1 | <0.001*** |
|                                                             | Moderately    | 31  | 27.7 | 81  | 72.3 |           |
|                                                             | Not satisfied | 3   | 6.3  | 45  | 93.8 |           |

\*Significant \*\*highly significant \*\*\*extremely significant

**Supplementary Table 3: MSPSS scores and prenatal depression**

|                                   | Depression<br>Yes   | Depression<br>No    |                            |                    |                |
|-----------------------------------|---------------------|---------------------|----------------------------|--------------------|----------------|
| <b>MSPSS score</b>                | <b>Mean SD</b>      | <b>Mean SD</b>      | <b>mean<br/>difference</b> | <b>CI</b>          | <b>p-value</b> |
| Significant<br>others<br>subscale | <b>18.43(3.86)</b>  | <b>13.14(6.75)</b>  | <b>5.29</b>                | <b>4.32-6.27</b>   | <0.001         |
| Family<br>subscale                | <b>18.9 (4.02)</b>  | <b>12.85(6.99)</b>  | <b>5.33</b>                | <b>4.32-6.35</b>   | <0.001         |
| Friends<br>subscale               | <b>12.26(7.17)</b>  | <b>9.32(6.58)</b>   | <b>2.93</b>                | <b>1.73-4.14</b>   | <0.001         |
| <b>MSPSS total</b>                | <b>48.88(11.07)</b> | <b>35.31(15.99)</b> | <b>13.56</b>               | <b>11.13-15.99</b> | <0.00          |
